# Supplementary material for: On the use of high-frequency surface wave oceanographic research radars as bistatic single-frequency oblique ionospheric sounders
Source: Copernicus journal article supplement (doi:10.5194/amt-15-4531-2022), 2022-08-10
Supplement: Supplementary file 1 [file amt-15-4531-2022-supplement.zip]

Archive with 5 entries (5 files):
- amt-15-4531-2022-supplement-title-page.pdf
- figS01.png
- figS02.png
- figS04.png
- figS03.png
