# Supplementary material for: On the use of high-frequency surface wave oceanographic research radars as bistatic single-frequency oblique ionospheric sounders
Source: Copernicus journal article supplement (doi:10.5194/amt-15-4531-2022), 2022-08-10
Supplement: Supplementary file 1 [file amt-15-4531-2022-supplement.zip › amt-15-4531-2022-supplement-title-page.pdf]

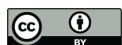

## *Supplement of*

# **On the use of high-frequency surface wave oceanographic research radars as bistatic single-frequency oblique ionospheric sounders**

**Stephen R. Kaepler et al.**

*Correspondence to:* Stephen R. Kaepler ([skaepl@clemson.edu](mailto:skaepl@clemson.edu))

- [amt-15-4531-2022-supplement-title-page.pdf](#)
- [figS01.png](#)
- [figS02.png](#)
- [figS03.png](#)
- [figS04.png](#)

The copyright of individual parts of the supplement might differ from the article licence.
