# Supplementary figures and images for: On the use of high-frequency surface wave oceanographic research radars as bistatic single-frequency oblique ionospheric sounders
Source: Copernicus journal article supplement (doi:10.5194/amt-15-4531-2022), 2022-08-10

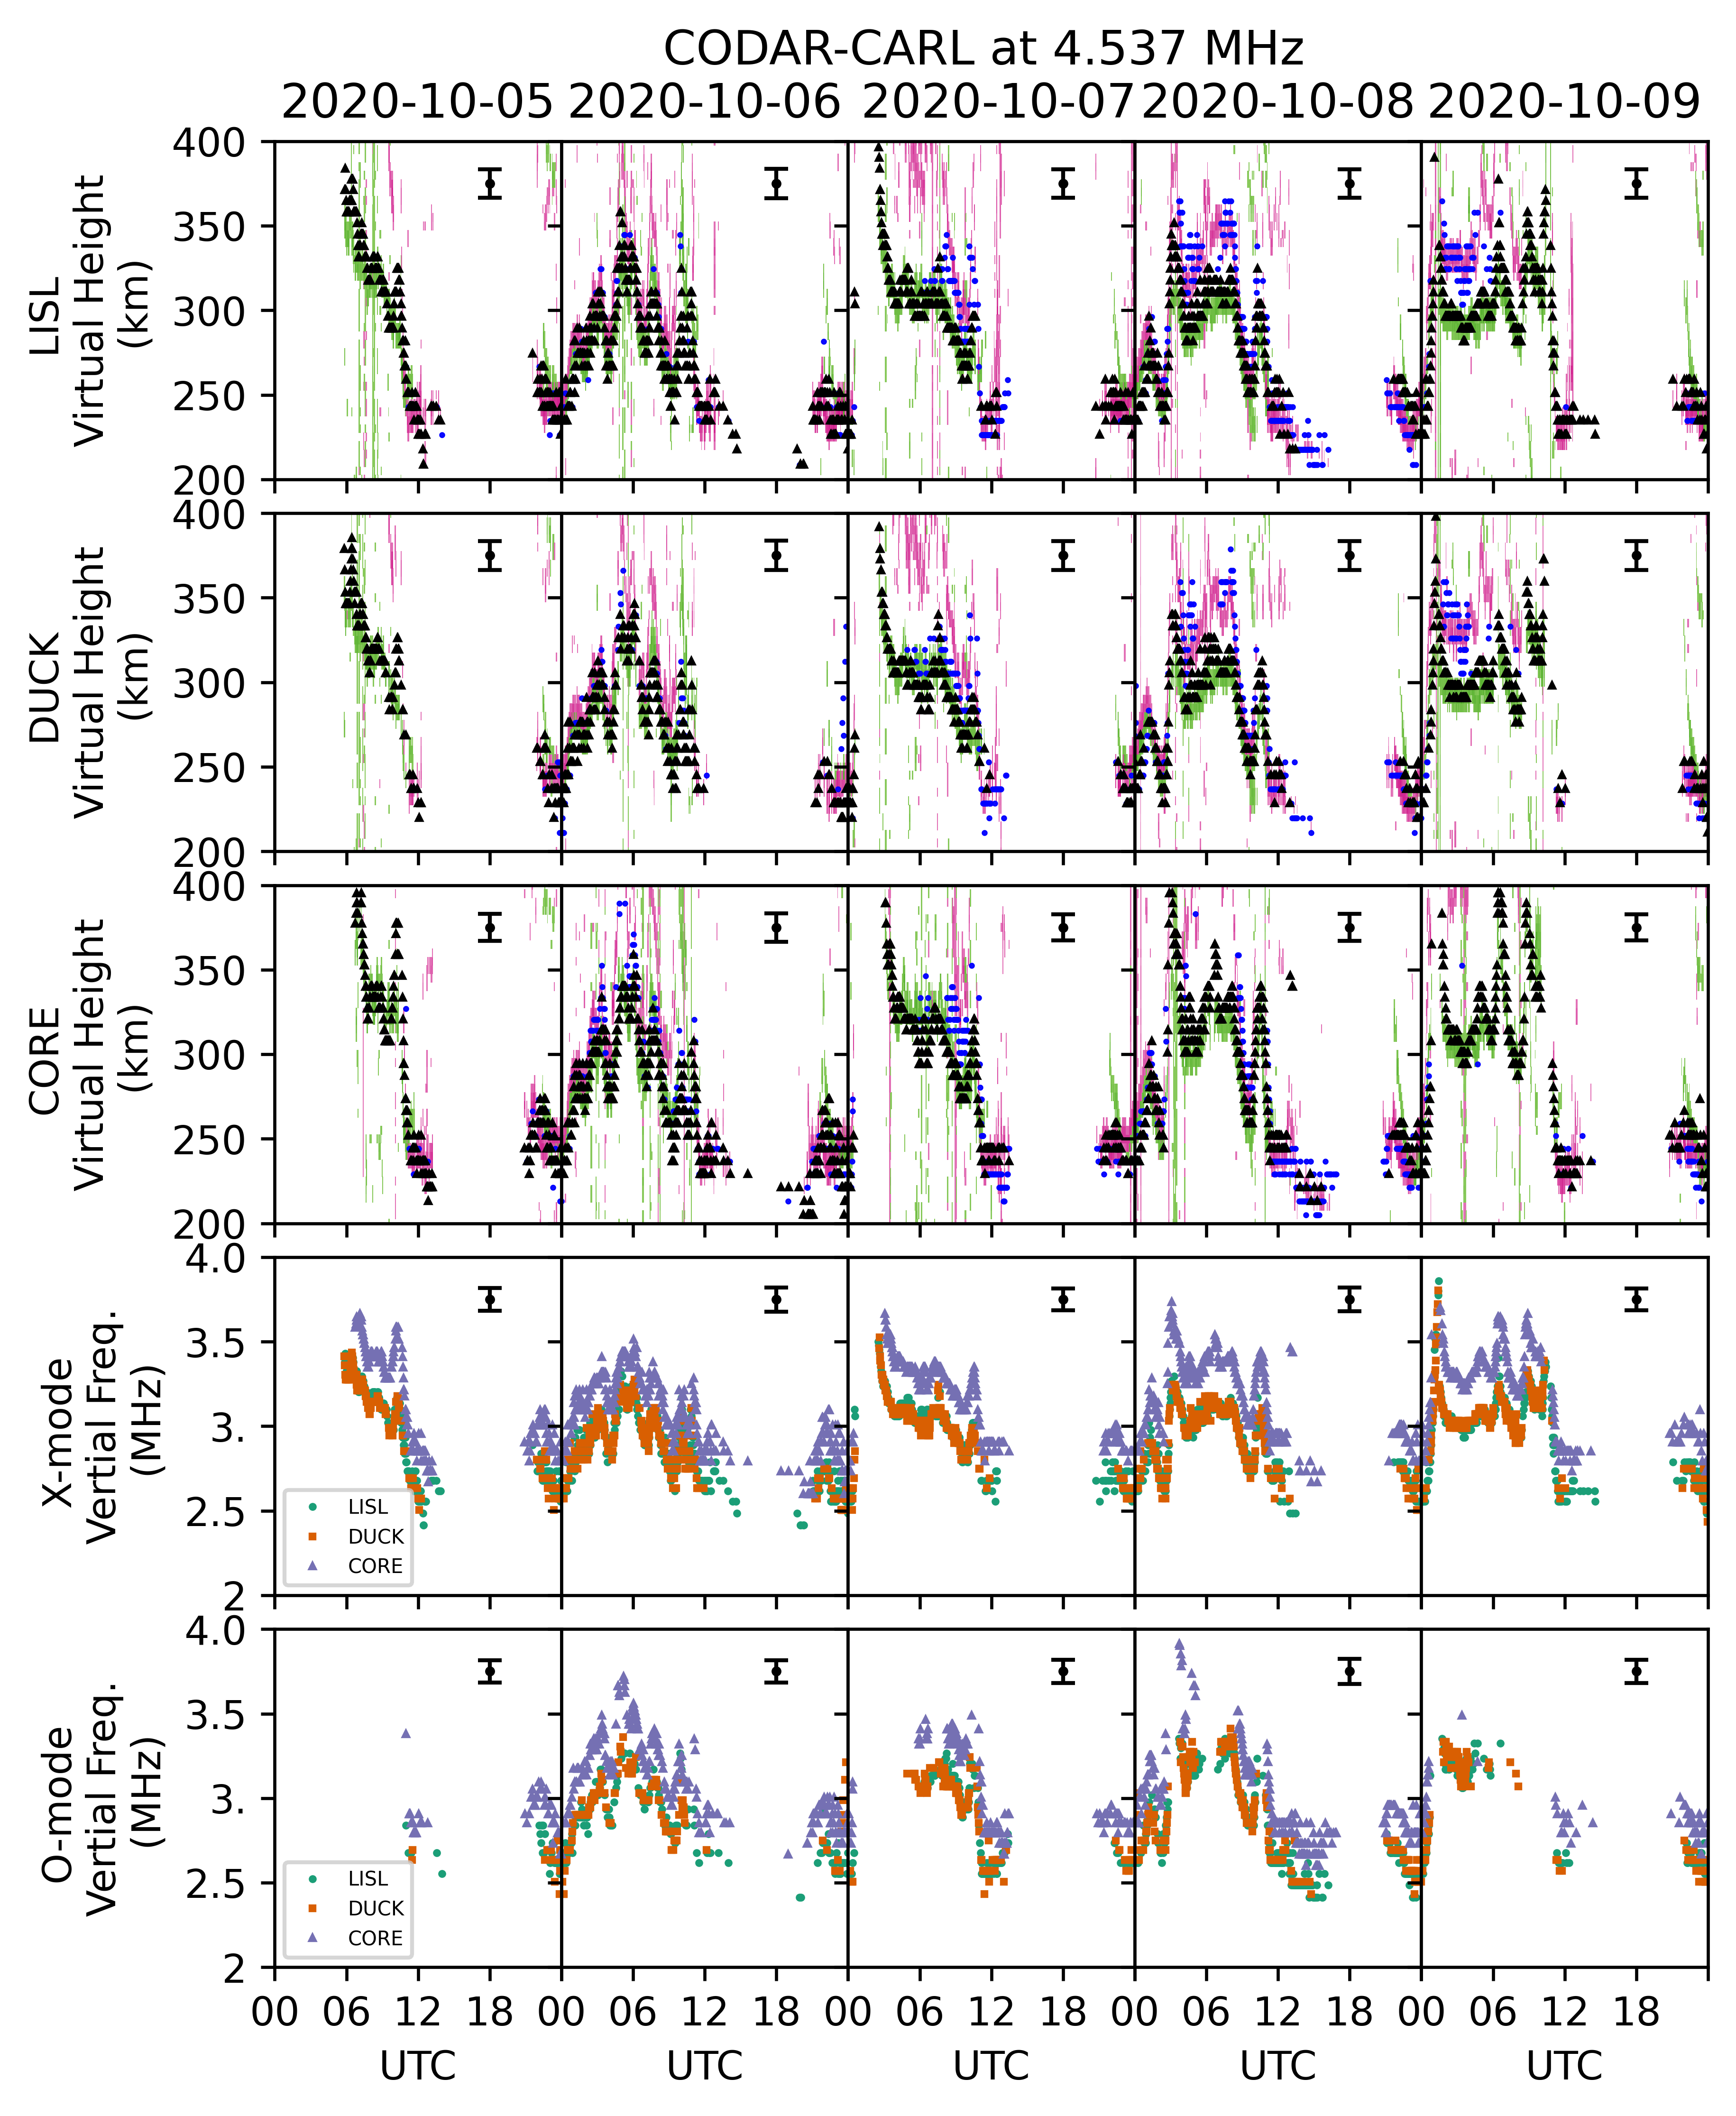

Supplement: Supplementary file 1 [file amt-15-4531-2022-supplement.zip › figS01.png]

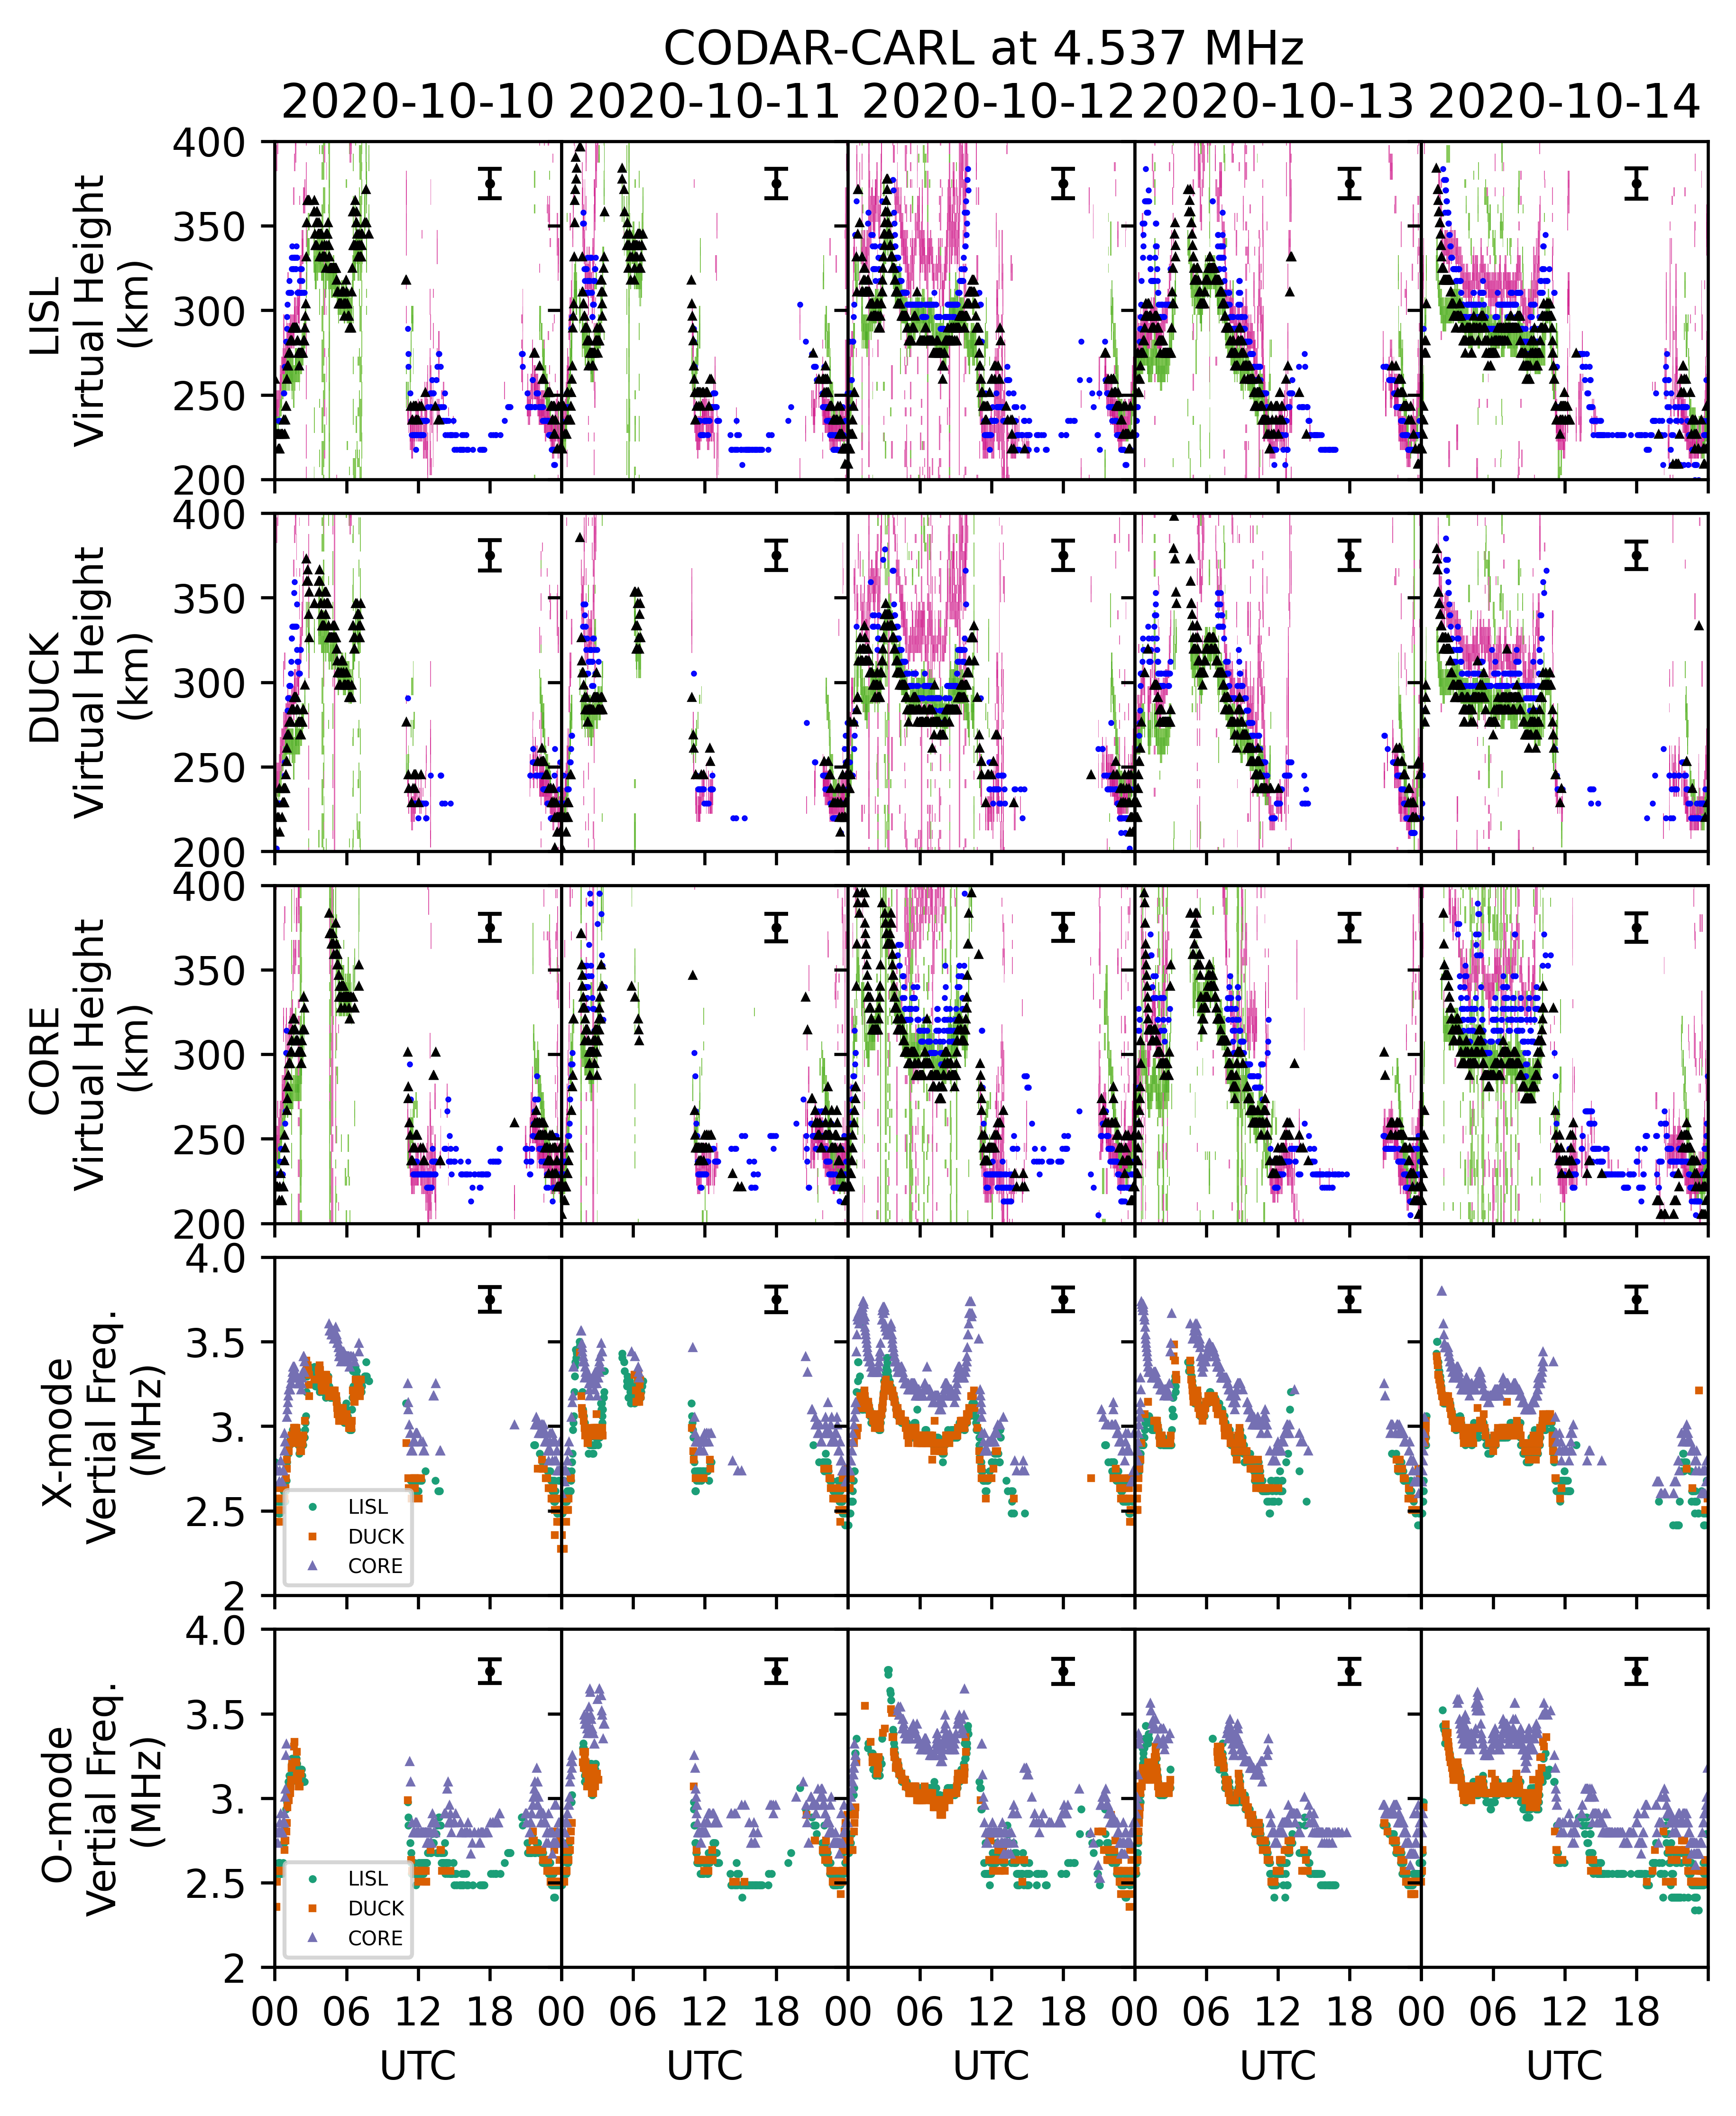

Supplement: Supplementary file 1 [file amt-15-4531-2022-supplement.zip › figS02.png]

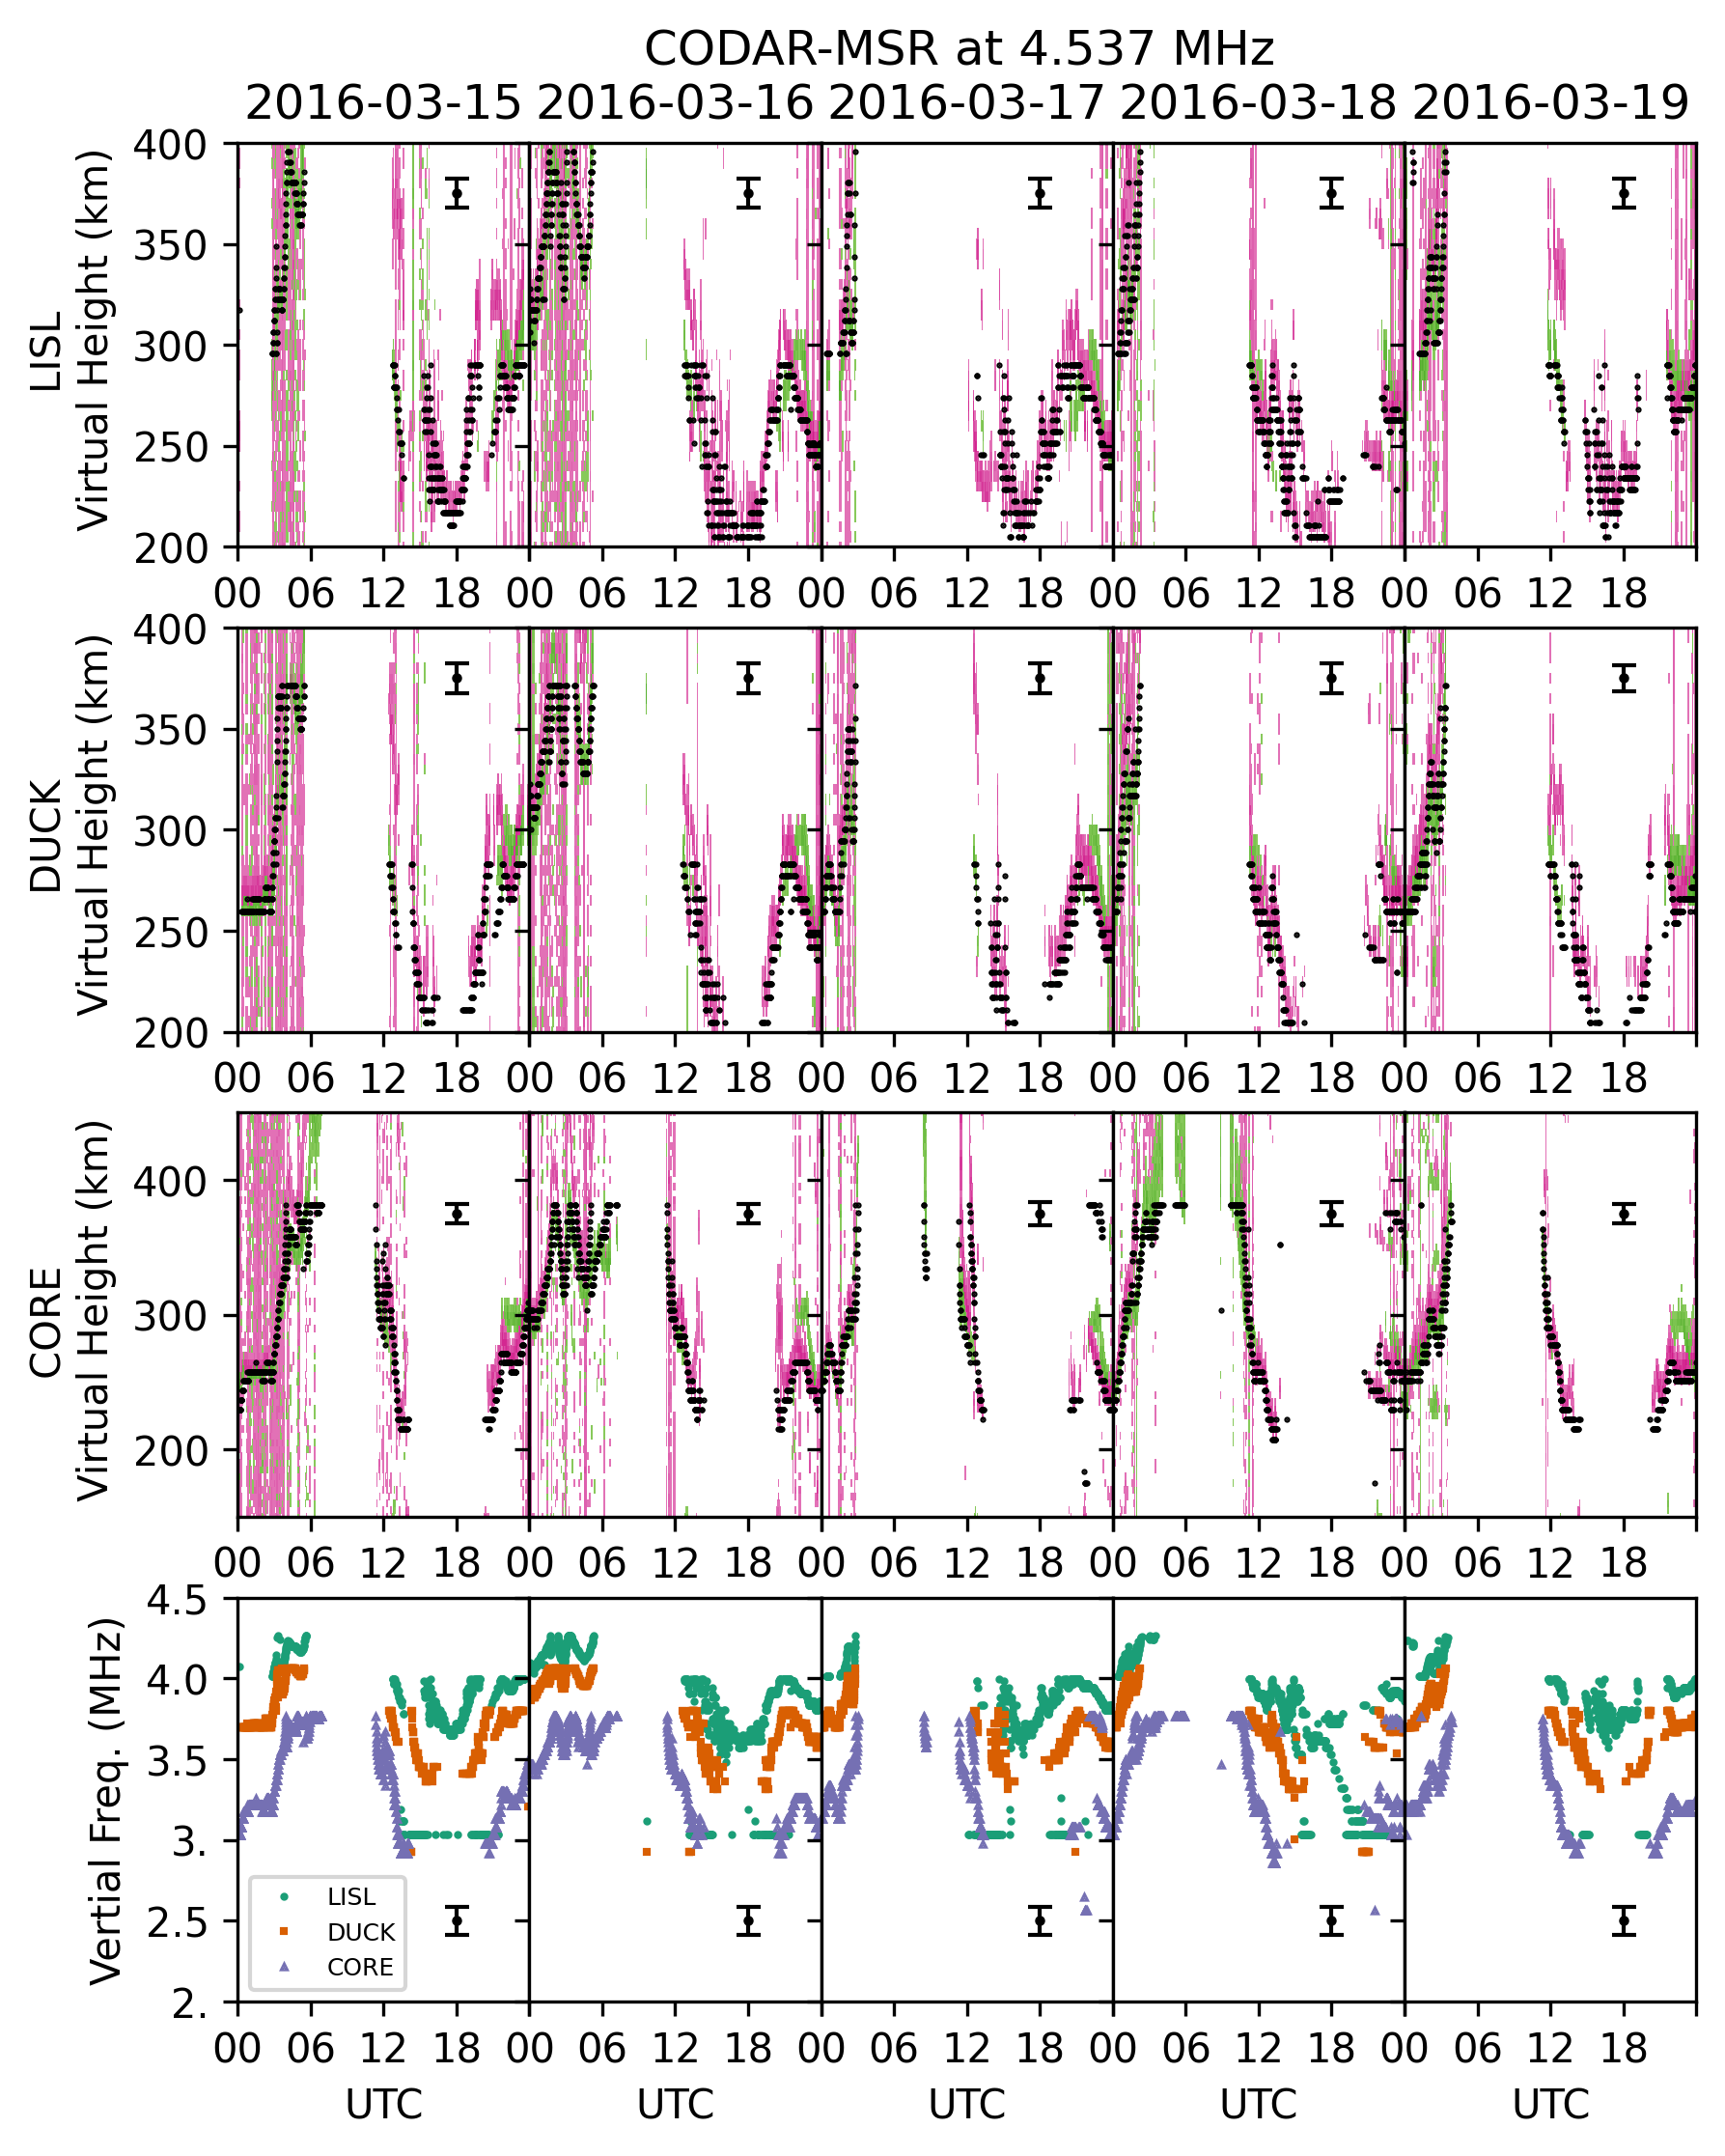

Supplement: Supplementary file 1 [file amt-15-4531-2022-supplement.zip › figS04.png]

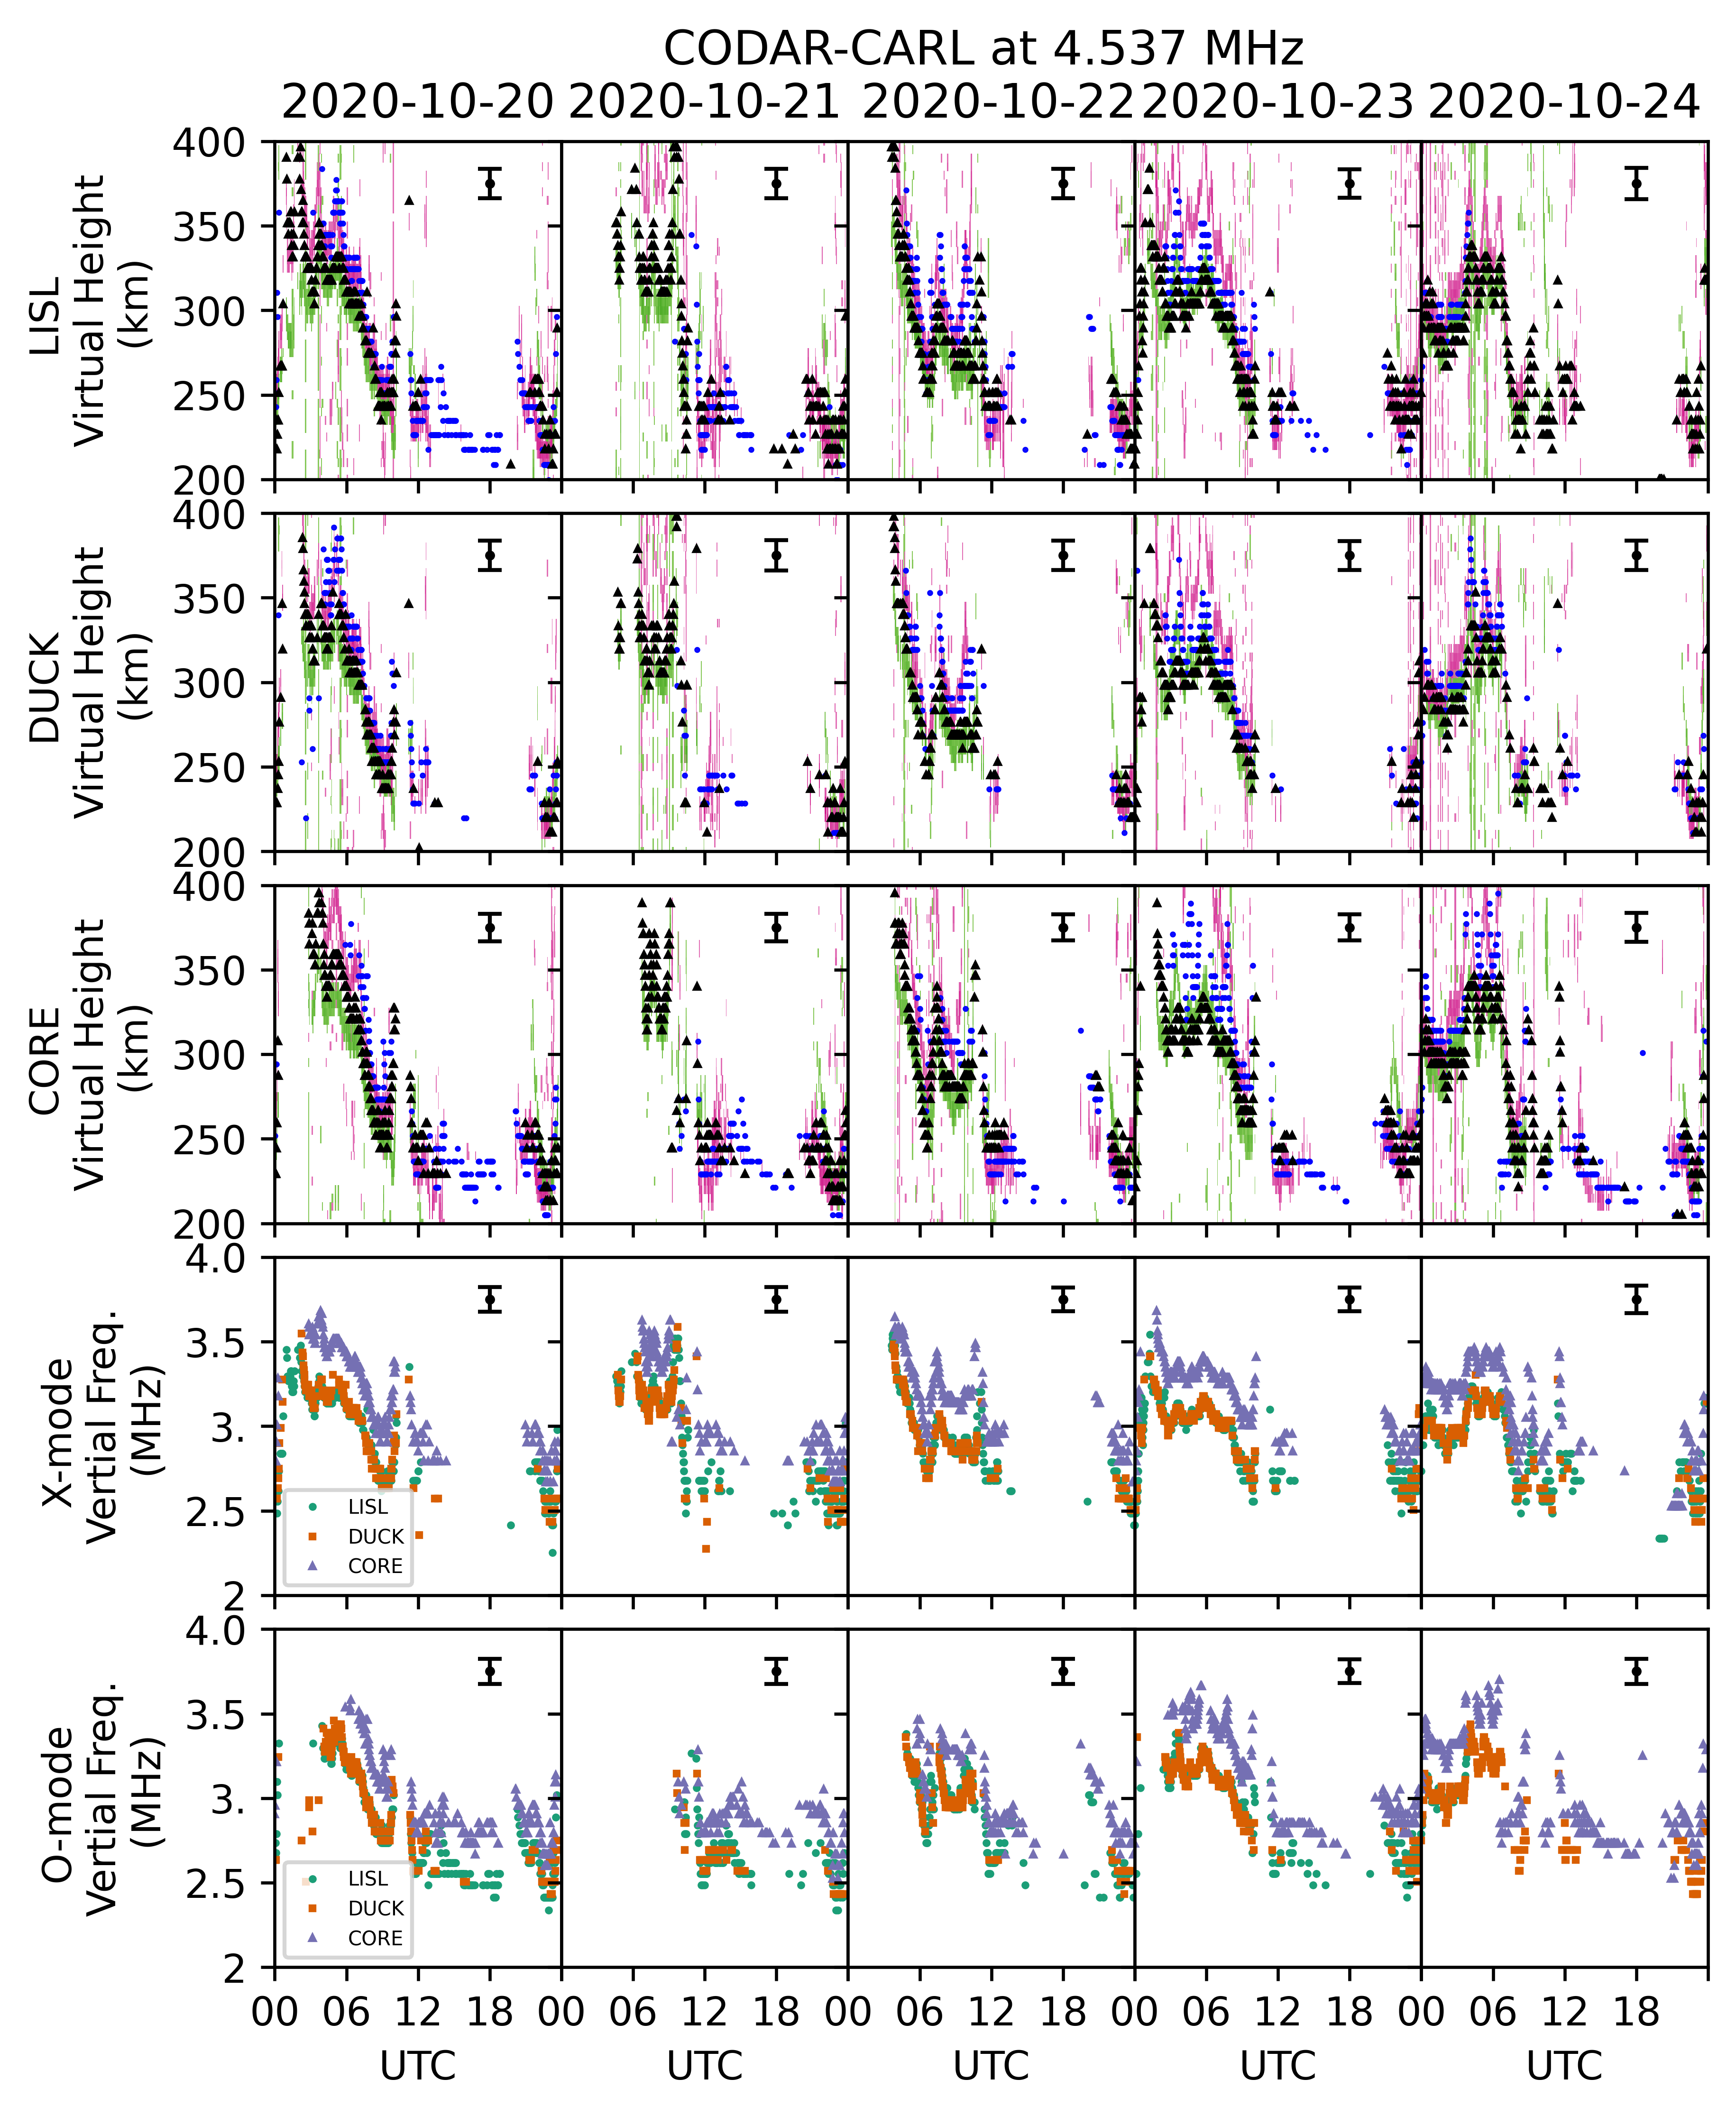

Supplement: Supplementary file 1 [file amt-15-4531-2022-supplement.zip › figS03.png]
